# Supplementary material
Source: Elsevier journal article supplement (https://www.sciencedirect.com/science/article/pii/S2387020620304769)
Supplement: mmc1 [file S2387020620304769:mmc1.doc]

**Table 2. Individual patient data, at the start and at 72-96h of treatment with tocilizumab plus glucocorticoids**

|  | **Treatment** | **Days since the admission to the treatment with TCZ** | **Status** | **T ºC**  **(Basal)** | **T, ºC**  **(72h)** | **CPR (mg/dl) basal** | **CPR**  **(mg/dl)**  **72h** | **Lymphocytes**  **(mm3)**  **Basal** | **Lymphocytes**  **(mm3)**  **72h** | **O2, basal** | **O2, Requirements at 72-96h** | **Currently Clinical status** | **Hospitalization**  **(days)** |
| --- | --- | --- | --- | --- | --- | --- | --- | --- | --- | --- | --- | --- | --- |
| 1 | | TCZ 1 dose | | --- | | 2 | | S | | --- | | 39,4 | 36,5 | 18 | 2,2 | 800 | 700 | Mask oxygen, FiO2: 100% | Improvement | Discharge from hospitalization | 26 |
| 2 | TCZ 1 dose | 5 | CS | 38,5 | 36,3 | 36,8 | 1,9 | 500 | 800 | Invasive Mechanical ventilation | Extubated 48 hours after the start of treatment | Discharge from hospitalization | 45 |
| 3 | TCZ 2 doses | 9 | CS | 38,2 | 37,3 | 44 | 25,3 | 600 | 820 | Invasive Mechanical ventilation | Neutral | Discharge from hospitalization | 48 |
| 4 | TCZ 1 dose | 10 | CS | 38,5 | 36,8 | 14,3 | 0,1 | 400 | 800 | Invasive Mechanical ventilation. | Extubated 72 hours after the start of treatment | Discharge from hospitalization | 20 |
| 5 | TCZ 1 dose | 16 | CS | 38,1 | 37 | 18,9 | 1,1 | 900 | 1700 | Invasive Mechanical ventilation. | Extubated 96 hours after the start of treatment | Discharge from hospitalization | 32 |
| 6 | TCZ 1 dose | 5 | S | 37,1 | 36,4 | 12,9 | 3,7 | 700 | 800 | High flow oxygen. FIO2 100% | Improvement | Discharge from hospitalization | 16 |
| 7 | TCZ 1 dose | 2 | CS | 39,1 | 37,0 | 56 | 18 | 400 | 200 | Invasive Mechanical ventilation | Deterioration | Discharge from ICU | 42 |
| 8 | TCZ 1 dose | 13 | CS | 37,6 | 36,0 | 25 | 6,1 | 900 | 1100 | Invasive Mechanical ventilation. | Extubated 96 hours after the start of treatment | Discharge from hospitalization | 52 |
| 9 | TCZ 1 dose | 1 | S | 36,3 | 36,9 | 12,3 | 3,1 | 900 | 900 | High flow oxygen. FiO2: 100% | Improvement | Discharge from hospitalization | 17 |
| 10 | TCZ 1 dose | 4 | S | 36,6 | 36,1 | 10 | 1 | 1300 | 1000 | Mask Oxygen 50% | Improvement | Discharge from hospitalization | 23 |
| 11 | TCZ 1 dose | 13 | CS | 39,2 | 36,5 | 8,5 | 0,9 | 400 | 1200 | Invasive Mechanical ventilation. | Extubated 48 hours after the start of treatment | Discharge from hospitalization | 25 |
| 12 | TCZ 1 dose | 15 | CS | 38,9 | 37 | 14,1 | 5,1 | 700 | 600 | Invasive Mechanical ventilation. | Improvement | Discharge from hospitalization | 36 |
| 13 | TCZ 2 doses | 16 | CS | 40,7 | 37,7 | 56 | 6,3 | 700 | 3200 | Invasive Mechanical ventilation. | Improvement | Discharge from hospitalization | 52 |
| 14 | TCZ 1 dose | 12 | CS | 39,5 | 39 | 8,7 | 1 | 300 | 200 | Invasive Mechanical ventilation. | Deterioration | Death | 30 |
| 15 | TCZ 1 dose | 8 | CS | 39,3 | 37,2 | 39 | 5,8 | 800 | 1400 | Invasive Mechanical ventilation. | Neutral | Death | 24 |
| 16 | TCZ 1 dose | 18 | CS | 37,3 | 38 | 15 | 25 | 600 | 800 | Invasive Mechanical ventilation. | Deterioration | Death | 25 |
| 17 | TCZ 1 dose | 8 | S | 36 | 36,3 | 15,1 | 1 | 1800 | 1900 | Mask. Oxygen. FiO2: 50%, | Improvement | Discharge from hospitalization | 15 |
| 18 | TCZ 2 doses | 4 | CS | 37,6 | 36,5 | 8,6 | 0,2 | 900 | 300 | Non-invasive mechanical ventilation. | Improvement | Discharge from hospitalization | 33 |
| 19 | TCZ 1 dose | 3 | S | 38,2 | 37 | 12,4 | 0,5 | 1500 | 3100 | Mask Oxygen. FiO2: 50% | Improvement | Discharge from hospitalization | 13 |
| 20 | TCZ 1 dose | 11 | S | 36,3 | 36,5 | 8,5 | 0,1 | 900 | 1400 | Mask Oxygen. FiO2 100%, | Improvement | Discharge from hospitalization | 14 |
| 21 | TCZ 2 doses | 2 | CS | 38,5 | 38,7 | 12,4 | 1,9 | 600 | 700 | Invasive Mechanical ventilation. | Deterioration | Death | 11 |
| 22 | TCZ 1 dose | 3 | S | 38,7 | 36,3 | 12 | 0,1 | 1400 | 4000 | Mask Oxygen. FiO2 50%, | Improvement | Discharge from hospitalization | 8 |
| 23 | TCZ 1 dose | 20 | CS | 39,5 | 37 | 30 | 5,1 | 500 | 700 | Invasive Mechanical ventilation. | Neutral | Death | 29 |
| 24 | TCZ 1 dose | 3 | CS | 40,1 | 37 | 31,8 | 4,2 | 700 | 1100 | Non-invasive mechanical ventilation. | Non-invasive Mechanical ventilation withdrawn 48 h after | Discharge from hospitalization | 15 |
| 25 | TCZ 1 dose | 9 | CS | 39,5 | 40,2 | 46 | 15,2 | 400 | 2000 | Invasive Mechanical ventilation. | Deterioration | ICU | 40 |

CS: Critical Severe; ICU: Intensive Cardiac Unit; S:Severe TCZ: Tocilizumab; Tº: Temperature
